# Supplementary material for: Downregulation of mitochondrial complex I induces ROS production in colorectal cancer subtypes that differently controls migration
Source: PubMed Central journal article supplement (PMC10398918; doi:10.1186/s12967-023-04341-x), 2023-08-03

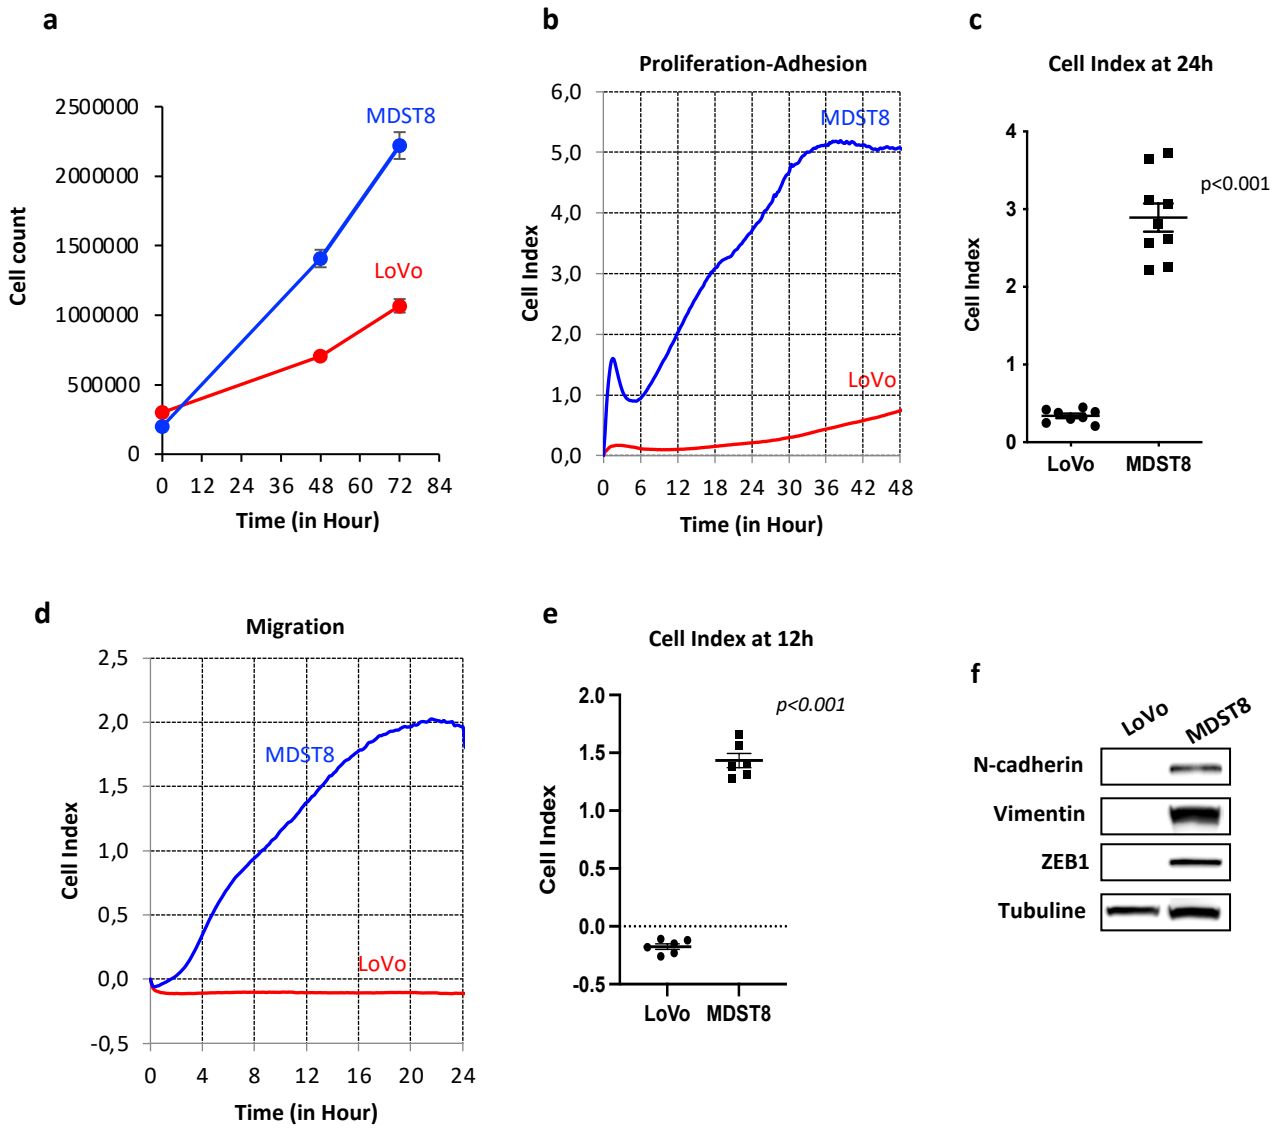

Supplemental Figure 1

**a**

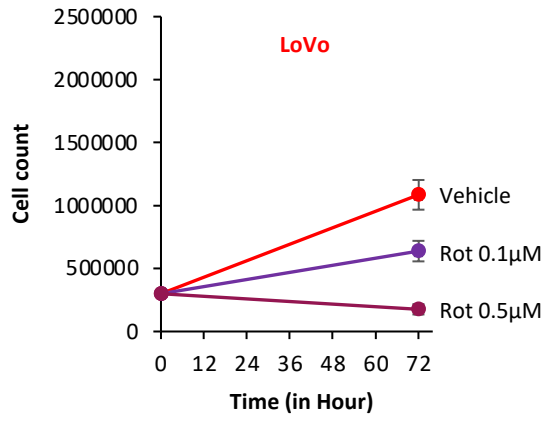

**b**

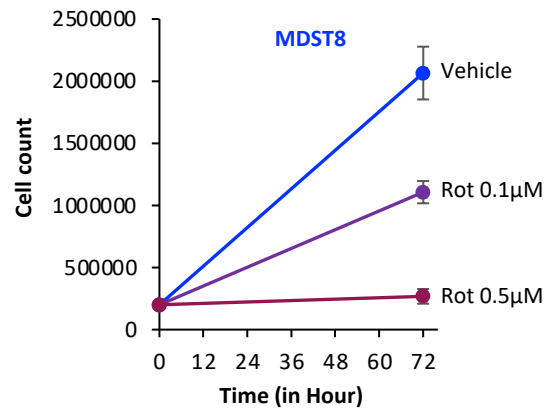

Supplemental Figure 2

**a**

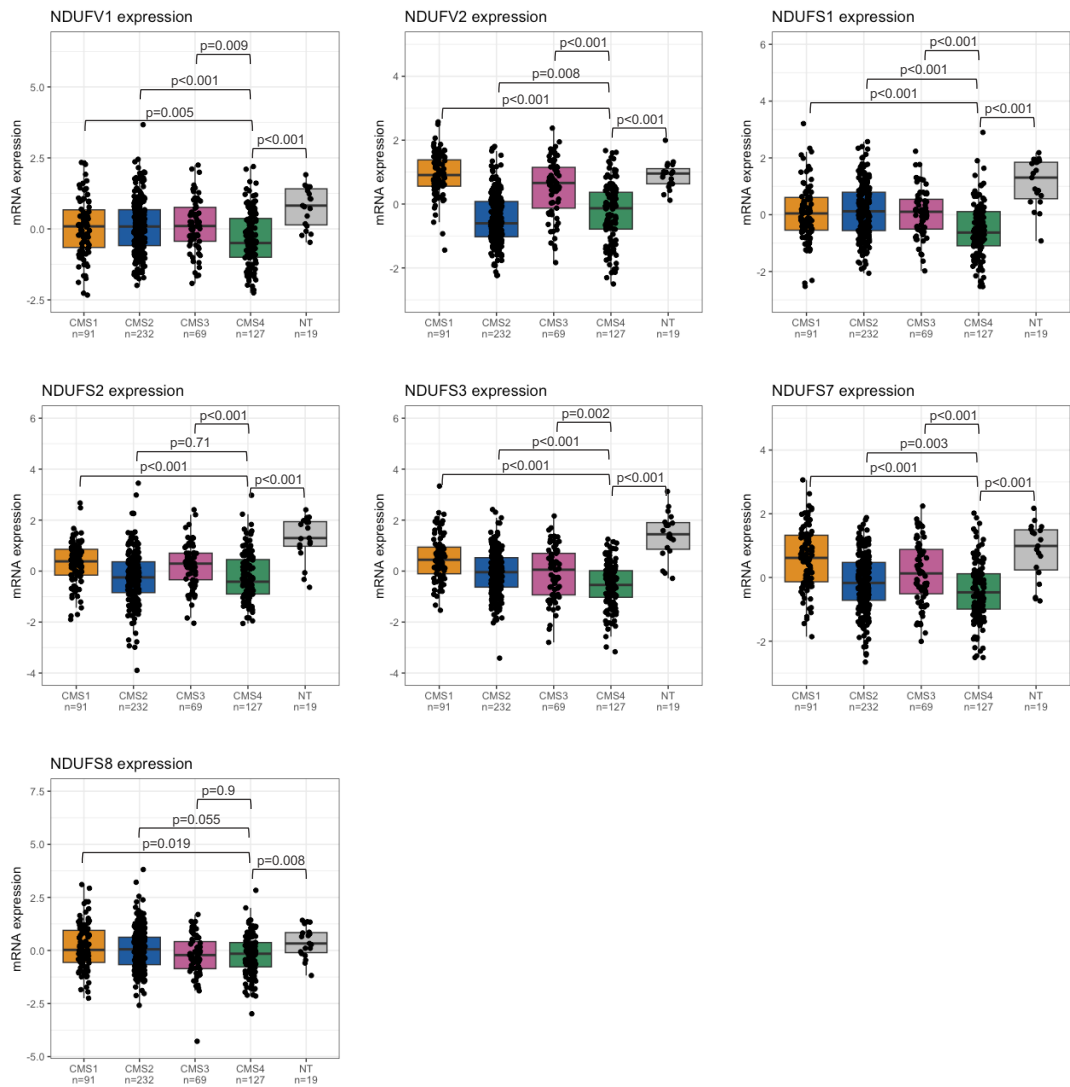

**a**

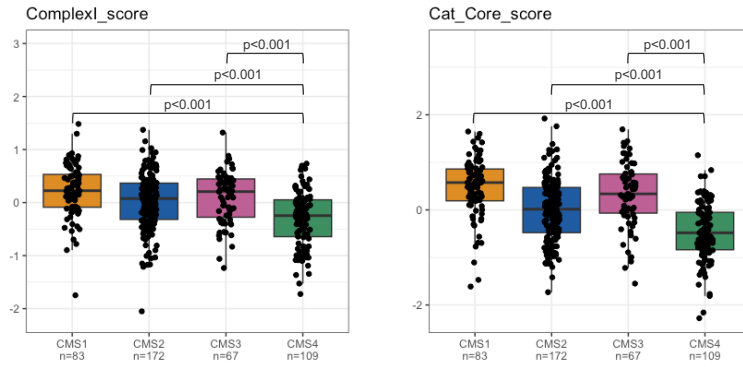

**b**

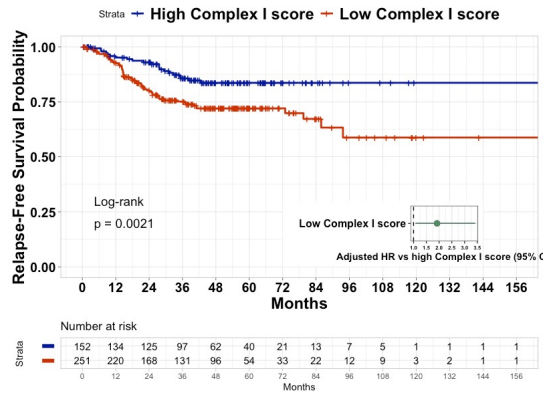

Supplemental Figure 4

**a**

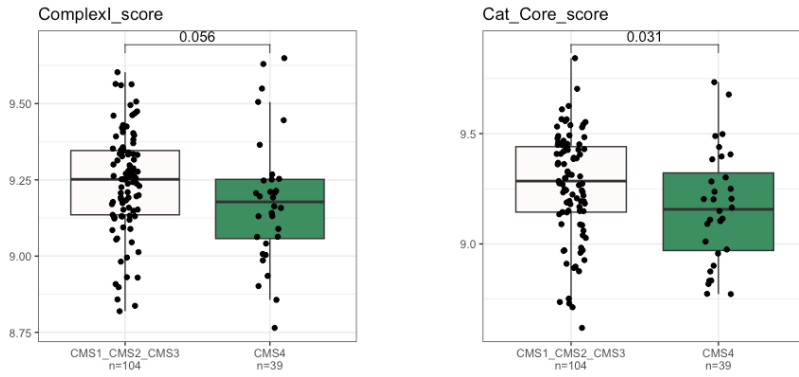

**b**

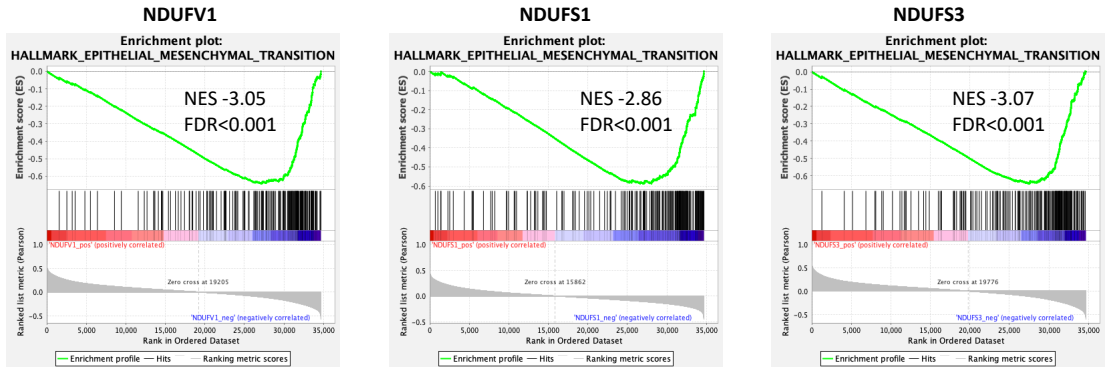

Supplement: 12967_2023_4341_MOESM1_ESM.pdf [file 12967_2023_4341_MOESM1_ESM.pdf]
